# Supplementary material
Source: PubMed Central journal article supplement (PMC3968501)

## Supplementary Figure Legends

### Figure S1.

#### **NAM catabolite analysis in NAM-treated rats.**

Male 8-week-old Wistar rats (n= 5 to 6/group)) were intraperitoneally injected with either NAM dissolved in isotonic saline (1 g/kg body weight). After 3 or 6 h, total NAM catabolites were measured in urine. (A) NAM, (B) MNA, (C) 2-Py, (D) 4-Py. Data are presented as mean  $\pm$  SEM. \*\* $P < 0.01$  versus vehicle-treated rats.

### Figure S2

#### **Effect of NAM on plasma and urine $P_i$ and Ca**

Male 8-week-old Wistar rats (n= 5 to 6/group)) were intraperitoneally injected with either NAM dissolved in isotonic saline (1 g/kg body weight) or saline. Metabolic cages were used for 3 or 6 h. Plasma and urine were collected after 3 h (I) or 6 h (II). (A) Plasma  $P_i$ , (B) Urine  $P_i$ / Cr, (C) Plasma Ca, (D) Urine Ca/Cr. Data are presented as mean  $\pm$  SEM. \* $P < 0.05$  versus vehicle-treated rats.

### Figure S3

#### **Renal BBMVs Na/ $P_i$ transport activity and levels of NaPi-IIa expression in NAM treated rats.**

Male 8-week-old Wistar rats (n=5 to 6/group)) were intraperitoneally injected with either NAM dissolved in isotonic saline (1 g/kg body weight) or saline. Renal BBMVs were purified after 3 or 6 h. (A) Na/ $P_i$  transport activity in renal BBMVs. (B) Western blotting analysis of NaPi-IIa in renal BBMVs. Each lane was loaded with 20  $\mu$ g of renal BBMVs. Actin was used as an internal control. Data are presented as mean  $\pm$  SEM.

\* $P < 0.05$ , \*\* $P < 0.01$  versus vehicle-treated rats.

#### **Figure S4**

##### **Effect of FK866 as a Nampt-specific inhibitor on PH mice**

PH mice were intraperitoneally injected with FK866 (n=5-8/group; 25 mg/kg body weight). FK866 was immediately injected after hepatectomy.<sup>31</sup> Urine Pi/urine creatinine (Cr) and plasma Pi were measured 8 h after injecting FK866 in sham and PH mice. (A) Urine Pi/ Cr. (B) Plasma Pi. Data are presented as mean  $\pm$  SEM. \* $P < 0.05$ , \*\* $P < 0.01$

#### **Reference**

31. Pittelli M, Formentini L, Faraco G, Lapucci A, Rapizzi E, Cialdai F, Romano G, Moneti G, Moroni F, Chiarugi A: Inhibition of nicotinamide phosphoribosyltransferase: cellular bioenergetics reveals a mitochondrial insensitive NAD pool. *J Biol Chem* 285: 34106-34114, 2010.

A

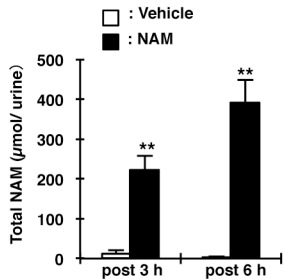

B

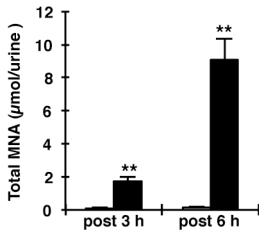

C

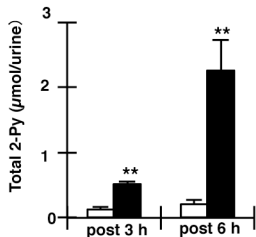

D

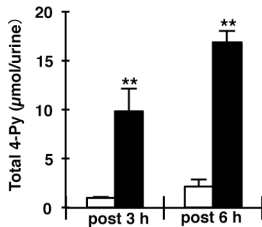

I)

A

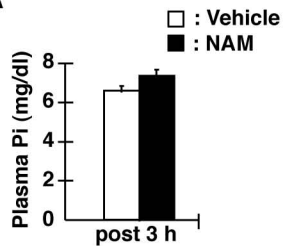

B

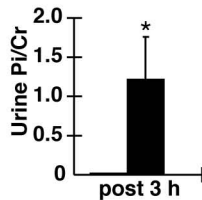

C

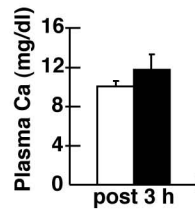

D

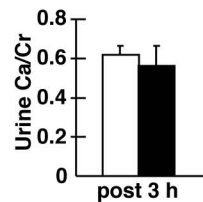

II)

A

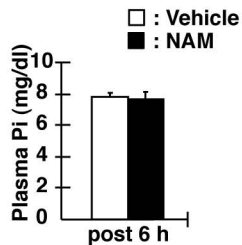

B

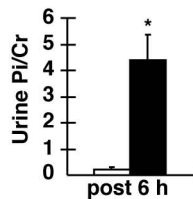

C

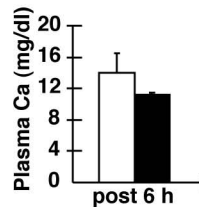

D

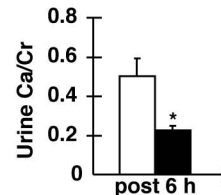

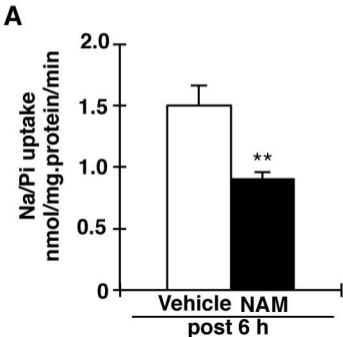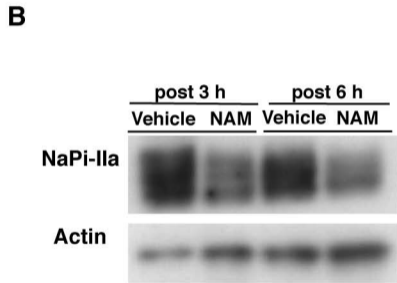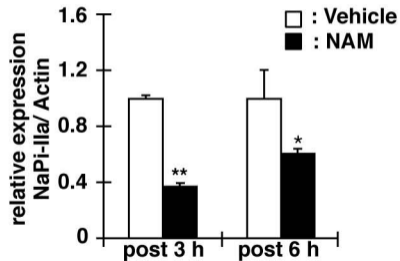

Figure S4

**A**

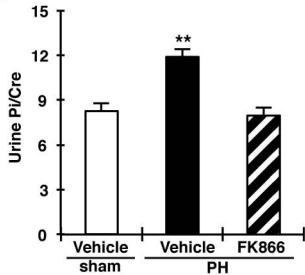

**B**

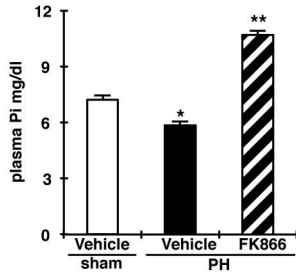

Supplement: ASN.2013060569_ASN2013060569SupplementaryData.pdf [file ASN.2013060569_ASN2013060569SupplementaryData.pdf]
